# Supplementary material
Source: PubMed Central journal article supplement (PMC5154468)
Supplement: SD9.pdf [file SD9.pdf]

SUPPLEMENTAL APPENDIX

Imported disease screening prior to chemotherapy for oncolohematologic malignancies and bone marrow transplant

| Latent or imported infection                        | Intervention                                                                                                                                                                                                                                                                                                                                                                                                                  |
|-----------------------------------------------------|-------------------------------------------------------------------------------------------------------------------------------------------------------------------------------------------------------------------------------------------------------------------------------------------------------------------------------------------------------------------------------------------------------------------------------|
| HIV                                                 | HAART initiation according to Human immunodeficiency virus consultant.                                                                                                                                                                                                                                                                                                                                                        |
| HBsAg (+) or anti-HBc (+)                           | Risk stratification anti-HBc (+) <ul style="list-style-type: none"> <li>• Undetectable DNA: close monitoring, if anti-HBs negative vaccine is recommended</li> <li>• DNA detectable: lamivudine or entecavir according to hepatology specialist and close monitoring</li> <li>• Risk stratification HbsAg (+): lamivudine or entecavir according to hepatology specialist. Close monitoring</li> </ul>                        |
| HCV                                                 | Risk stratification <ul style="list-style-type: none"> <li>• Undetectable DNA: standard follow-up</li> <li>• Detectable DNA: treatment according to hepatology specialist</li> </ul>                                                                                                                                                                                                                                          |
| Latent tuberculosis infection                       | Isoniazid 5 mg/kg daily (maximum: 300 mg) 6–9 months                                                                                                                                                                                                                                                                                                                                                                          |
| Latent syphilis                                     | Early latent syphilis: benzathine penicillin G 2.4 million units administered intramuscularly, single injection<br>Late latent syphilis: benzathine penicillin G 2.4 million units administered intramuscularly weekly during 3 weeks                                                                                                                                                                                         |
| <i>Toxoplasma</i> sp. infection                     | Close monitoring                                                                                                                                                                                                                                                                                                                                                                                                              |
| <i>Strongyloides</i> sp. infection                  | Ivermectine 200 µg/kg oral route 2 consecutive days. Administration may be repeated 2 weeks later                                                                                                                                                                                                                                                                                                                             |
| Other intestinal parasite                           | Specific treatment according with the result                                                                                                                                                                                                                                                                                                                                                                                  |
| <i>Schistosoma</i> sp. infection                    | <ul style="list-style-type: none"> <li>• Haematobium/mansoni: praziquantel 40 mg/kg single dose</li> <li>• Japonicum: praziquantel 60 mg/kg/day single dose</li> </ul>                                                                                                                                                                                                                                                        |
| <i>Trypanosoma cruzi</i> infection (Chagas disease) | Benznidazol 5–7 mg/kg/day during 60 days                                                                                                                                                                                                                                                                                                                                                                                      |
| Human T-cell lymphotropic virus-1 infection         | Close monitoring                                                                                                                                                                                                                                                                                                                                                                                                              |
| <i>Histoplasma</i> sp. infection                    | Close monitoring                                                                                                                                                                                                                                                                                                                                                                                                              |
| <i>Leishmania</i> sp. infection                     | Close monitoring                                                                                                                                                                                                                                                                                                                                                                                                              |
| <i>Plasmodium</i> sp. infection                     | <ul style="list-style-type: none"> <li>• <i>Plasmodium falciparum</i>: artemether and lumefantrine combination. Four tablets as initial dose, four tablets 8 hours later, four tablets every 12 hours for the next 2 days</li> <li>• <i>Plasmodium ovale/vivax</i>: chloroquine 25 mg base/kg during 3 days, followed by primaquine</li> <li>• <i>Plasmodium malariae</i>: chloroquine 25 mg base/kg during 3 days</li> </ul> |

HBsAg = hepatitis B surface antigen; HBc = hepatitis B core antibody.
